# Supplementary material
Source: Research Square preprint supplement (doi:10.21203/rs.3.rs-9628328/v1)
Supplement: Supplementary file 1 [file e7c6f29a5e07638c52727b5b.xlsx]

## Sheet: Sheet1
Variable	Early CRRT	Delayed CRRT	SMD	SMD
	(Mean or %)	(Mean or %)	Before	After OW
Age	58.878	59.846	0.071	0.058
Male	0.661	0.638	0.048	0.082
AKI Stage 3	2.826	2.938	0.35	0.308
Lactate	4.355	2.933	0.341	0.306
Fluid Balance	7.131	8.048	0.059	0.097
Vasopressor Count	88.209	119.953	0.308	0.281
Platelet	198.939	184.012	0.131	0.047
Bilirubin	6.879	9.282	0.2	0.088
Baseline Creatinine	1.768	1.284	0.458	0.244
Table S1. Covariate Balance Before and After Overlap Weighting Values are presented as mean for continuous variables and proportion (%) for binary variables. Four variables (baseline creatinine, AKI stage 3, lactate, and vasopressor count) retained an SMD ≥ 0.10 after overlap weighting, indicating residual imbalance.
